# Supplementary material
Source: PubMed Central journal article supplement (PMC5687310)

Supplementary Figure 1a. Density of Simulated Measured Agreement Values by Prevalence in Category 1

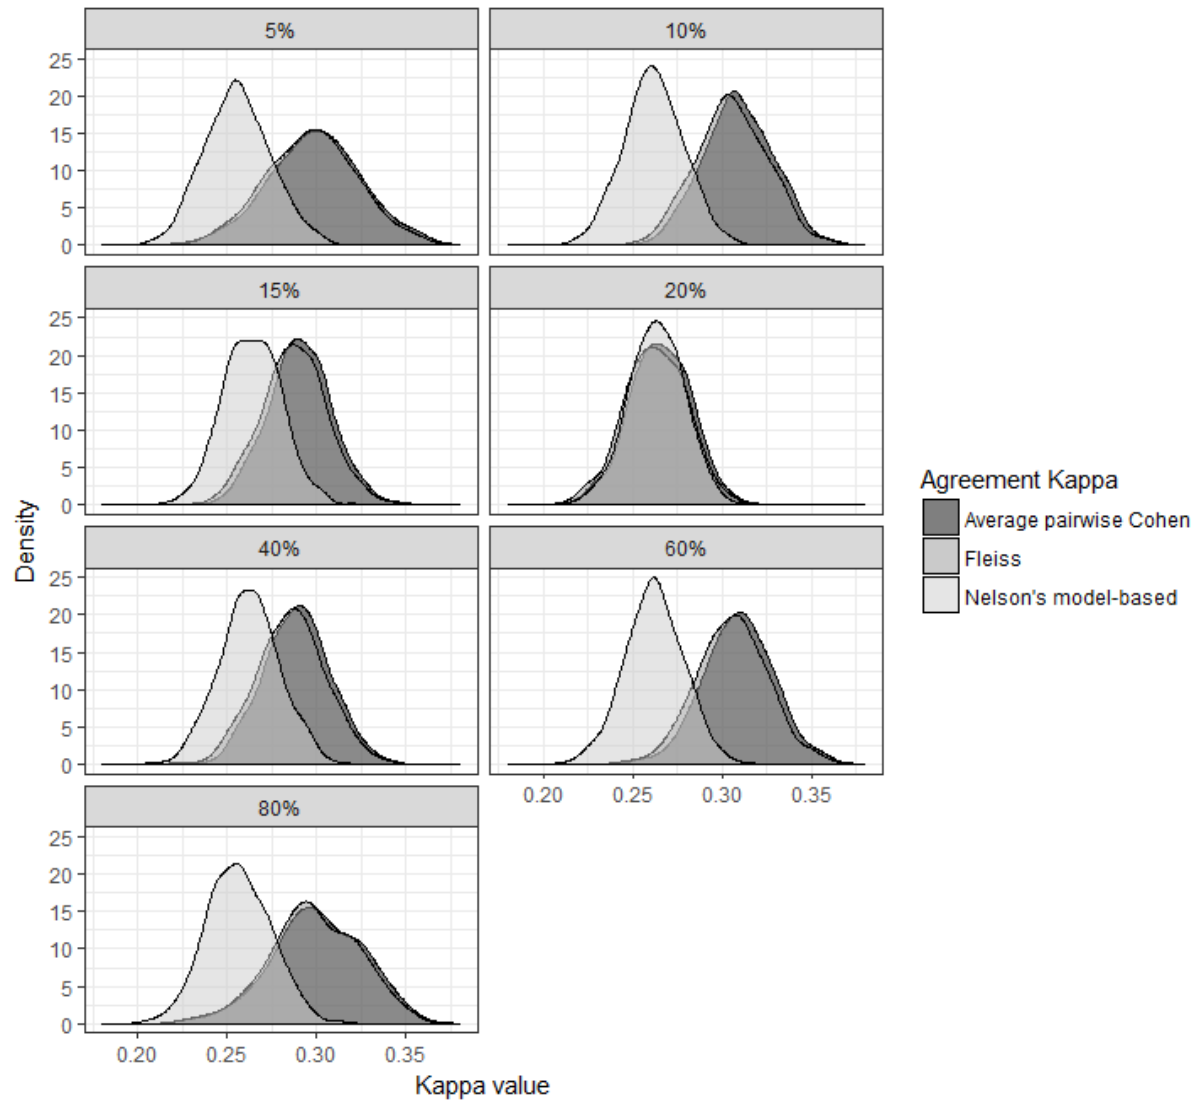

Supplementary Figure 1b. Density of Simulated Measured Association Values by Prevalence in Category 1

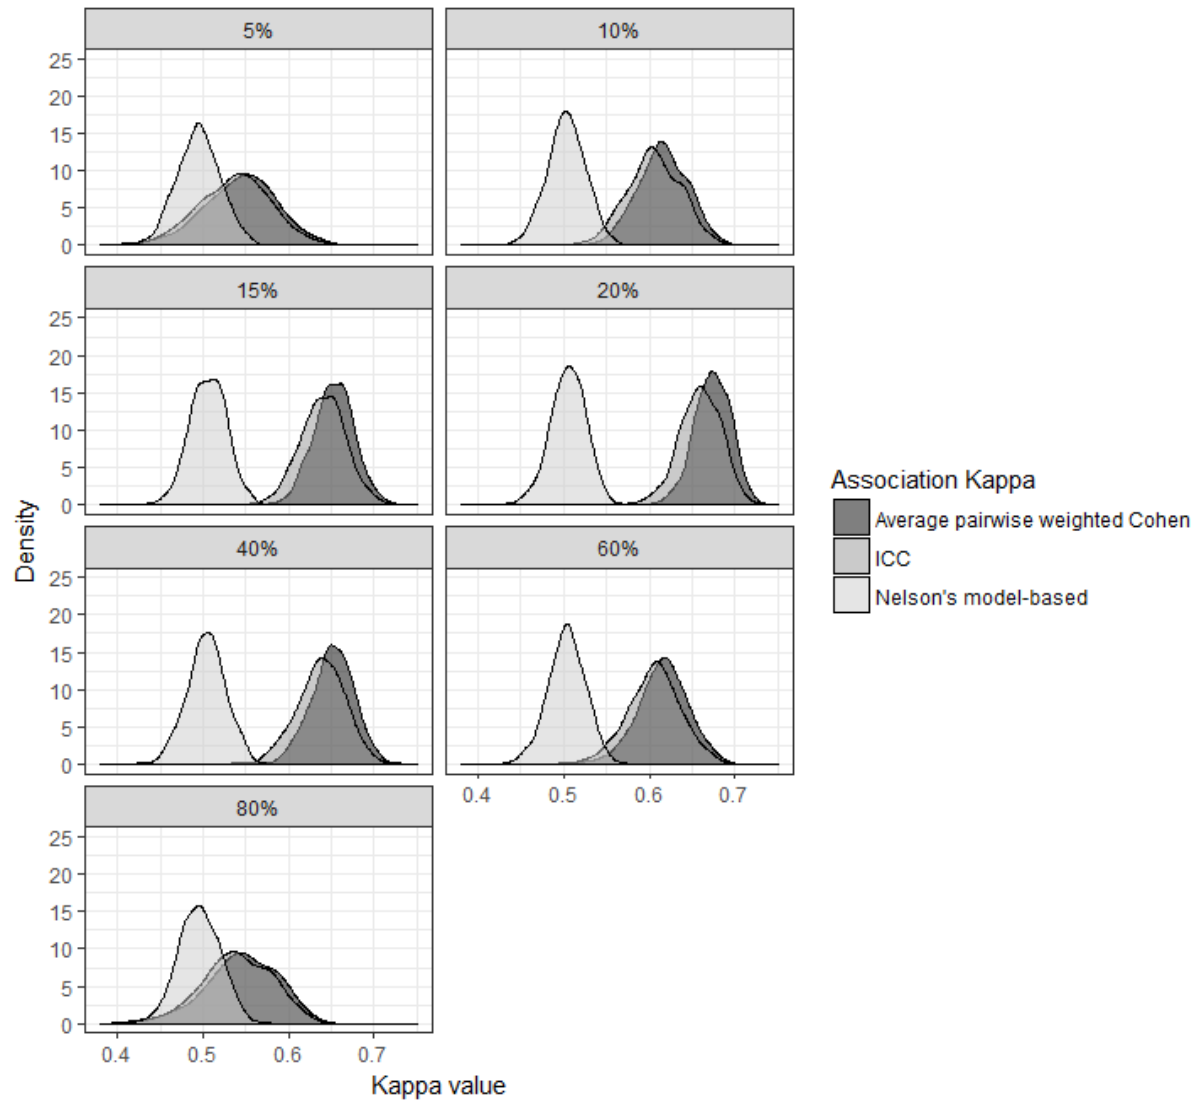

Supplement: NIHMS907970-supplement-supplement_1.pdf [file NIHMS907970-supplement-supplement_1.pdf]
